# Supplementary material
Source: publisher site journal article supplement (https://www.degruyterbrill.com/publication/isbn/9783111437453/downloadAsset/9783111437453_Aufgaben%20zu%20den%20Kapiteln%20mit%20L%C3%B6sungen.pdf)
Supplement: Supplementary file 1 [file 9783111437453_Aufgaben%20zu%20den%20Kapiteln%20mit%20L%C3%B6sungen.pdf]

# Musterlösung

KONTROLL- UND VERTIEFUNGSFRAGEN ABSCHNITT 1 - 5

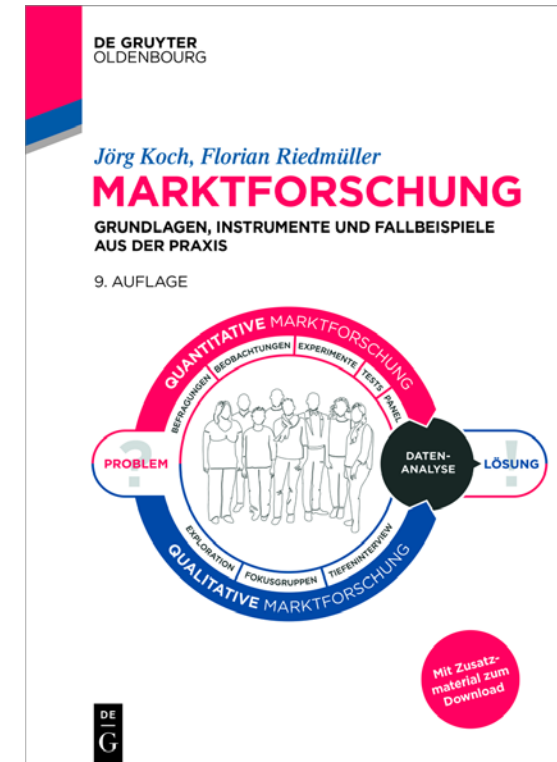

# Abschnitt 1.1 – Seite 19

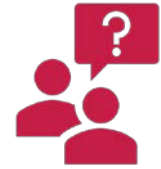

**Frage 1:** Auf welchen Wurzeln ist die betriebswirtschaftliche Marktforschung zurückzuführen und welche relevanten Forschungsschwerpunkte sind damit heute verbunden? Recherchieren Sie auf den Webseiten des Nürnberger Instituts für Marktentscheidungen (<https://www.nim.org>) deren Entstehungsgeschichte.

**Frage 2:** Wie setzt sich der Markt für Anbieter von Marktforschungsdienstleistungen in Deutschland zusammen? Analysieren Sie auf [www.adm-ev.de/die-branche/mafo-zahlen](http://www.adm-ev.de/die-branche/mafo-zahlen) die Entwicklung der letzten Jahre und verschaffen Sie sich unter [www.marktforschungsanbieter.de](http://www.marktforschungsanbieter.de) einen Überblick wichtiger Unternehmen in den verschiedenen Kategorien.

**Frage 3:** Erklären Sie, warum das Wissenschaftlichkeitsgebot, das Anonymisierungsgebot sowie das Trennungsgebot für die Arbeit von Marktforschern in Deutschland so wichtig ist. Analysieren Sie dazu den Text der „Deutschen Erklärung“ zum ICC/ESOMAR International Codex von 2017.

# Abschnitt 1.1 - Lösungen

---

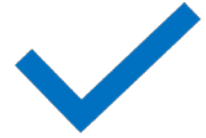

## **Frage 1: Wurzeln der Marktforschung**

Wurzeln der betrieblichen Marktforschung: Konsumenten-, Produkt und Werbeanalysen

A.C. Nielsen: 1923 Gründung durch Arthur C. Nielsen in Chicago → Messung von Produktqualität mit Hilfe von Befragungen

Wurzeln der betrieblichen Marktforschung: Konsumenten-, Produkt und Werbeanalysen

Entstehungsgeschichte nachzulesen unter:

<https://www.nim.org/ueber-uns/historische-wurzeln/nim-historie>

<https://mediadb.eu/2024/05/28/68-nielsen-holdings-plc/>

# Abschnitt 1.1 - Lösungen



## Frage 2: Markt für Anbieter von Marktforschungsdienstleistungen

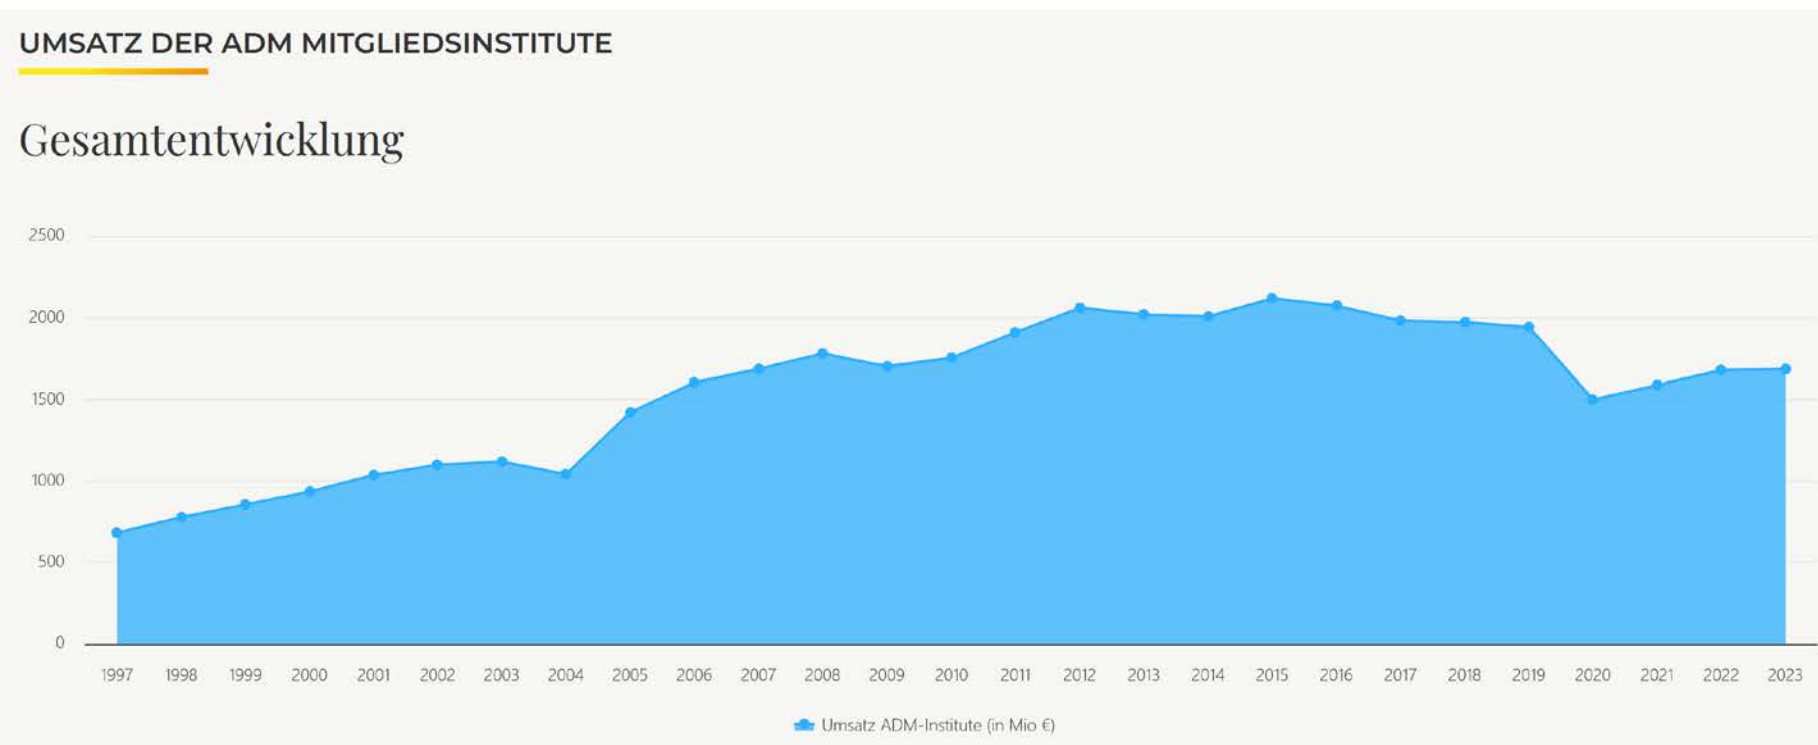

<https://www.adm-ev.de/die-branchen/mafo-zahlen/>

# Abschnitt 1.1 - Lösungen



## Frage 3: „Deutschen Erklärung“ zum ICC/ESOMAR International Codex

**Wissenschaftlichkeitsgebot:** Die Untersuchungen der Markt-, Meinungs- und Sozialforschung dienen grundsätzlich dem Gewinn generalisierbarer Erkenntnisse und müssen entsprechend dem Forschungsgegenstand und dem Erkenntnisinteresse mit angemessenen Methoden und Techniken empirischer Forschung durchgeführt werden.

**Anonymisierungsgebot:** Daten, die bei natürlichen oder juristischen Personen durch Befragung, Beobachtung, Aufzeichnung oder auf andere Art erhoben werden, dürfen dem Auftraggeber und anderen Dritten (einschließlich interner Stellen) nur in einer Form übermittelt oder bereitgestellt werden, die die Teilnehmer der Untersuchung nicht erkennen lässt oder identifizierbar macht.

**Trennungsgebot:** Wissenschaftliche Untersuchungen der Markt-, Meinungs- und Sozialforschung müssen in organisatorischer und technischer Hinsicht und klar erkennbar von anderen Tätigkeiten getrennt sein.

Quelle: <https://www.dgof.de/verbaende-der-deutschen-markt-und-sozialforschung-veroeffentlichen-weinheimer-erklaerung/>

# Abschnitt 1.2 – Seite 27



**Frage 1:** Welche fünf Schritte werden bei der Definition von Marktforschungsstudien nacheinander absolviert. Welche Frage steht bei den einzelnen Schritten jeweils im Mittelpunkt?

**Frage 2:** Was versteht man im Bereich der Informationssammlung unter strukturgebenden Analysen und variablenspezifischen Definitionen? Recherchieren Sie Modelle und Definitionen zur Messung der Aufmerksamkeitswirkung von Werbekampagnen.

**Frage 3:** Stellen Sie sich vor, dass Sie als Marktforschungsinstitut für einen Kunden auf Basis von dessen Briefing eine Befragung im Wert von 50.000 € angeboten und den Zuschlag bekommen haben. Kurz vor dem Start der Studie teilt Ihnen der Kunde mit, dass das Budget aus internen Sparmaßnahmen auf 30.000 € gekürzt wurde. Welche Konsequenzen wird das auf die Durchführung der Studie haben? Berücksichtigen Sie die Abhängigkeitsverhältnisse des Marktforschungs-Budgets aus Abbildung 10.

# Abschnitt 1.2 - Lösungen



## Frage 1: Fünf Schritte bei der Definition von Marktforschungsstudien

1. **Informationsbedürfnis:** Welches Entscheidungsproblem im Marketing besteht?
2. **Briefing des Untersuchungsbedarfs:** Was möchten Sie zur Lösung dieses Problems wissen?
3. **Informationssammlung:** Was wissen wir dazu bereits aus Sekundärmarktinformationen?
4. **Grobe Festlegung der Methodik:** Mit welcher Methode der quantitativen oder qualitativen Marktforschung lässt sich das lösen?
5. **Budgetierung:** Wie viel Budget ist zur Klärung der Frage für die relevante Methode circa einzusetzen?

# Abschnitt 1.2 - Lösungen



## Frage 2: Strukturgebenden Analysen und variablenspezifischen Definitionen

Unter **strukturgebenden Analysen** versteht man die Recherche nach **etablierte Theorien und Modelle**, die einen Einblick in die Wirkungszusammenhänge des Forschungsgegenstands geben.

Ergänzend zu den strukturgebenden Analysen aus wissenschaftlichen Veröffentlichungen können über Branchen- und Expertenstudien **variablenspezifische Definitionen** zur Gestaltung der eigenen Marktforschungsstudie gefunden werden. Diese beziehen sich nicht auf die Zusammenhänge zwischen verschiedenen Einheiten in einer Untersuchung, sondern setzen an den einzelnen Variablen an

## Frage 3: Konsequenzen von Kürzungen in Auftragsbudgets

Bei einer Kürzung des Budgets müssen die Rahmenparameter der geplanten Studie reduziert werden. Zum Beispiel kann der Fragbogen gekürzt, die Anzahl der Befragten reduziert, oder der Zeitraum zur Durchführung der Befragung verlängert werden.

Die Kosten lassen sich aufgrund der bestehenden Fixkosten einer Agentur bzw. einer Studie nur unterproportional reduzieren.



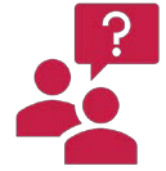

# Abschnitt 1.3 – Seite 45

---

**Frage 1:** Was ist der zentrale Unterschied zwischen einem ausgewählten Klumpen bei der Klumpenauswahl und einer ausgewählten Gruppe bei der Konzentrationsauswahl bezüglich der jeweilig zusammengefassten Teilnehmer?

**Frage 2:** Informieren Sie sich über die Webseiten der ADM über die ADM-Stichprobe für Telefonbefragungen (<https://www.adm-ev.de/leistungen/arbeitsgemeinschaft-adm-stichproben/>). Welches Auswahlprinzip liegt der Zusammensetzung dieser Stichprobe zugrunde?

**Frage 3:** Ein Unternehmen möchte den Bekanntheitsgrad einer seiner Marken bei den Zielkunden untersuchen lassen. Die Frage zur Bekanntheit wird gestützt unter Angabe des Markennamens abgefragt und kann mit Ja oder Nein beantwortet werden. Wie viele Personen muss das Unternehmen befragen, wenn die Messung eine Vertrauenswahrscheinlichkeit von 99 % erzielen möchte und der Zufallsfehler nicht mehr als 2,5%-Punkte abweichen soll?

# Abschnitt 1.3 - Lösungen



## Frage 1: Konzentrations- vs. Klumpenauswahl

Klumpenauswahl – **Zufallsauswahl**: Die Zufälligkeit bezieht sich hierbei nicht auf einzelne Einheiten, die aus einer oder mehreren Schichten gezogen werden, sondern auf eine geschlossene Gruppe (= Klumpen), die in ihrer Zusammensetzung der Grundgesamtheit entspricht.

Konzentrationsauswahl – **bewusstes Auswahlverfahren**: Man beschränkt sich dabei auf die Erhebung von solchen Elementen, die für den Untersuchungsgegenstand **besonders aussagefähig** sind und damit eine besondere Bedeutung haben. Diese „Schwergewichte“ der Grundgesamtheit werden gezielt herausgegriffen und komplett befragt, da sie einen hohen Erklärungsanteil für die Fragestellung liefern können.

# Abschnitt 1.3 - Lösungen



## Frage 2: ADM-Stichprobe

Der Auswahlrahmen, das sogenannte ADM-Telefonstichproben-System, basiert auf den im Internet veröffentlichten Eckdaten des Nummernraums, den die Bundesnetzagentur den Telefonanbietern zur Verfügung stellt und verwaltet. Dieser Nummernraum umfasst prinzipiell alle in der Bundesrepublik Deutschland nutzbaren Telefonnummern. Unter adaptiver Nutzung des von Sabine Häder und Siegfried Gabler entwickelten Generierungsverfahrens werden die relevanten Eckdaten der Bundesnetzagentur so aufbereitet,

- dass sie die Basis für die Generierung von 10er Blöcken bilden, die alle in der BRD nutzbaren Festnetznummern umfassen (sogenannte Festnetzdatei),
- dass alle in der BRD nutzbaren Mobilfunknummern auf Basis von 10.000er Blöcken generiert werden (sogenannte Mobilfunkdatei).

Da nicht nur die Ziehung der Nummernstichproben (und damit der Zielpersonen bei den Mobilfunknummern) sondern auch die Auswahl der Zielperson im jeweils kontaktierten Privathaushalt bei den Festnetzstichproben als Zufallsauswahl realisiert werden, sind die ADM-Telefonstichproben als repräsentative Zufallsstichproben zu bewerten, die den in der mathematischen Statistik entwickelten Zufallsmodellen gehorchen.

## Frage 3: Berechnung einer Stichprobengröße

$$\frac{2,58^2 * 0,25}{0,025^2} = 2.662,56 = 2.663 \text{ Personen}$$

# Abschnitt 1.4 – Seite 58

---



**Frage 1:** Neben der Durchführung von eigenen Ein- und Mehrthemenbefragungen gibt es auch die Möglichkeit an Omnibus-Befragungen teilzunehmen. Recherchieren Sie auf den Webseiten <https://www.marktforschung.de/anbieter/omnibus-befragungen>, welche Omnibus-Befragungen mit welcher Methodik und welchen Zielgruppen regelmäßig stattfinden.

**Frage 2:** Stellen Sie die Vor- und Nachteile von persönlichen Befragungen und Befragungs-Apps gegenüber. Für welche Art von Untersuchungen würden Sie welche dieser beiden Befragungsformen einsetzen?

**Frage 3:** Was versteht man unter einem Mode-Fehler und warum wird das mögliche Auftreten solcher Fehler bei einem Mixed-Mode-Design in Kauf genommen?

# Abschnitt 1.4 - Lösungen



## Frage 1: Omnibus Befragungen

### CATI - Befragung : ARIS CATI Bus-System

- **1. Grundgesamtheit:** : Deutsche Bevölkerung in Privathaushalten ab 18 Jahren; **Ergebnislieferung:** Für 500 oder 1000 Fälle 7 Werktage nach Feldstart; **2. Grundgesamtheit:** Deutschsprachige Bevölkerung in Privathaushalten ab 14 Jahren; **Ergebnislieferung:** Für 500 oder 1000 Fälle 5 Werktage nach Feldstart
- **Stichprobe:** Repräsentative Telefonstichprobe aus der ADM-Auswahlgrundlage für Festnetztelefonstichproben, optional Dual Frame Stichprobe (70% Festnetz/30% Mobil) auf Anfrage

### CAPI-Befragung: KantarBus CAPI

- **Grundgesamtheit:** deutschsprachige Bevölkerung 14+ **Auswahlverfahren:** Quotenverfahren  
**Fallzahl:** n=2.000 **Ergebnislieferung:** n=2.000 nach 4-5 Tagen

### CAWI – Befragung: Bilendi Omnibus

- **Grundgesamtheit:** Teilnehmer der Bilendi Panels ab 16 Jahren in Deutschland (250.000), Österreich (30.000), Schweiz (50.000); **Ergebnislieferung:** dienstags (D und AT) , donnerstags (CH)  
**Stichprobe:** n=1.000 oder n=500; **Auswahlverfahren:** Bilendi Online-Access-Panel, aktiv rekrutiert; bevölkerungsrepräsentativ quotiert nach Alter, Geschlecht und Regionen

# Abschnitt 1.4 - Lösungen



## Frage 2: Persönliche Befragungen vs. Befragungs-Apps

| Vorteile                                                          |                                          | Nachteile                                          |                                                   |
|-------------------------------------------------------------------|------------------------------------------|----------------------------------------------------|---------------------------------------------------|
| Persönliche Befragung                                             | Befragungs-Apps                          | Persönliche Befragung                              | Befragungs-Apps                                   |
| Rekrutierung der Zielgruppen im Umfeld des Interessensgegenstands | Antworten sehr kurzfristig zur Verfügung | Aufwendige Gestaltung der Fragebögen               | Rekrutierung nur über Online-Access-Panel möglich |
| Umfangreiche Befragung möglich                                    | Sehr schnelle Durchführung               | Geringe Bereitschaft zur Teilnahme im eigenen Haus | Nur kurze Befragungen möglich                     |
| Hohe Bereitschaft der Teilnahme vor Ort bei Wartezeiten           | Sehr günstige Durchführungskosten        | Hohe Personalkosten für Interviewer                | Anreizsysteme verzerren die Antworten             |

agungs-Apps

# Abschnitt 1.4 - Lösungen



## Frage 3: Mixed Mode Design

Noch vor wenigen Jahren war es in der Marktforschung verpönt, im Rahmen einer Untersuchung mehrere Befragungsmethoden, wie z. B. Telefon- und Online-Befragungen miteinander zu kombinieren. Die jeweilige Befragungsmethode („*research mode*“) hat durch die individuelle Wiedergabe der Fragestellung einen Einfluss auf das Antwortverhalten der Probanden und kann bei der Zusammenführung folglich **Mode-Fehler** verursachen.

**Mixed-Mode-Designs** kombinieren unterschiedliche Befragungsmethoden für einzelne Studien und bieten den Probanden alternative Teilnahmemöglichkeiten an. Der Vorteil einer solchen Vorgehensweise liegt darin, dass der Zugang zu den Befragungsinhalten für jede Zielgruppe entsprechend ihrer Präferenzen sehr bequem ist und damit die jeweilige **Ausschöpfungsrage** gesteigert werden kann. Diese führt in der Folge zu einer **höheren Geschwindigkeit** in der Durchführung und **niedrigeren Kosten**, da bei einer nur singulär eingesetzten Methodik die Rekrutierung der jeweiligen Randgruppen sehr aufwendig ist.

# Abschnitt 1.5 – Seite 77

---



**Frage 1:** Welchen Vorteil hat der Einsatz von einer Konstantsummenskala gegenüber der Abfrage mit mehreren unabhängigen Rating-Skalen?

**Frage 2:** Was sind die zentralen Unterschiede bei der Messung von Einstellungen gegenüber Objekten nach der Fishbein- und der Trommsdorff-Skalierung?

**Frage 3:** Sehen Sie sich den Videobeitrag der Agentur (r)evolution zu den Möglichkeiten der Responsesteigerung in den verschiedenen Phasen eine Befragung an: <https://www.evolution-online.net/publikation/raetsel-response/>. Welche Erkenntnisse lassen sich daraus für ein erfolgreiches Reminder-Management gewinnen?



# Abschnitt 1.5 - Lösungen

---



## Frage 1: Konstanstummenskala

Bei der **Konstantsummenskala** können die unterschiedlichen Teilaspekte in einen Gesamtzusammenhang gebracht werden. Bei dieser werden die befragten Personen aufgefordert, eine bestimmte Anzahl von Punkten oder Ränge auf mehrere Faktoren in Bezug auf einen Sachverhalt zu verteilen. **Bei mehreren Rating-Skalen würden die Einzelbedeutungen isoliert von einander betrachtet werden.** Eine Konstantsummenskala setzt die identifizierten Komponenten hingegen in eine direkte Beziehung zueinander und fragt die Probanden nach deren relativen Bedeutung für die Kaufentscheidung.

# Abschnitt 1.5 - Lösungen



## Frage 2: Fishbein und Trommsdorff Skalierungen

Das mehrdimensionale **Fishbein-Modell** versucht die unterschiedlichen **kognitiven und affektiven** Wahrnehmungskomponenten von Personen in systematischer Form miteinander zu verknüpfen. Das Modell basiert auf der Annahme, dass sich die Einstellung aus dem subjektiven Wissen einer Person um eine Eigenschaft (= kognitive Komponente) sowie deren subjektiver Bewertung (= affektive Komponente) zusammensetzt, wobei diese beiden Komponenten **multiplikativ** miteinander zu einem Eindruckswert verknüpft werden. Die verschiedenen Eindruckswerte addieren sich zur Einstellung, weshalb der Ansatz auch den **komponierenden** Verfahren zugeordnet wird.

$$E_{ij} = \sum_{k=1}^n (A_{ijk} \cdot B_{ijk})$$

Die **Trommsdorff-Skalierung** nimmt ebenfalls eine differenzierte Abfrage der affektiven und der kognitiven Komponente über mehrere Eigenschaften eines Objekts vor. Die Ermittlung der affektiven Bedeutung einer Eigenschaft wird im Gegensatz zum Fishbein-Modell allerdings **indirekt** über **die ideale Ausprägung** eines Merkmals erhoben. Die Unter- und Übererfüllung einer Eigenschaft im Vergleich zum Ideal werden als negativ gesehen. Daher wird in der Formel für die Berechnung des Einstellungswerts nicht mit den absoluten Werten der Abweichungen, sondern mit deren Betrag gerechnet

$$E_{ij} = \sum_{k=1}^n |I_{ijk} - B_{ijk}|$$

# Abschnitt 1.5 - Lösungen

---



## Frage 3: Reminder Management

Erfolgreiches Reminder-Management setzt auf die gezielte **Optimierung von Responses**.

**Voraussetzung:** Ein Survey Monitor mit Blick auf die Gesamtentwicklung in Regionen/Ländern sowie ein Blick darauf, ob die Fallzahlen einen Bericht erlauben.

Ein Reminder per Brief weckt viel Aufmerksamkeit -> die Response verdoppelt sich. Auch ein dritter Reminder erzielt noch große Effekte (**jeder Kontaktpunkt steigert die Response** substantiell). Ein dritter Reminder sollten allerdings selektiv für Gruppen mit niedriger Teilnahme eingesetzt werden.

# Abschnitt 1.6 – Seite 95

---



**Frage 1:** Wie unterscheidet sich bei Beobachtungen eine offene von einer quasi-biotischen Situation?

**Frage 2:** Sehen Sie sich das folgende Video zu den Möglichkeiten der Gesichts- und Emotionserkennung aus der ARD-Mediathek an: <https://www.ardmediathek.de/video/w-wie-wissen/gesichtserkennung-ich-sehe-was-du-fuehlst/das-erste>. Welche Herausforderungen stellen solche Beobachtungen an den Datenschutz?

**Frage 3:** Vergleichen Sie die Beobachtungsmöglichkeiten des stationären Handels über Laufweganalysen und Scanner-Auswertungen mit den Klickpfadanalysen von Online-Händlern. Welchen Wissensvorsprung haben Online-Händler durch ihre vorhandenen Daten?

# Abschnitt 1.6 - Lösungen



## Frage 1: Beobachtungsformen

**Offene Situationen** klären die Versuchspersonen vorab über alle Aspekte einer durchzuführenden Beobachtung auf.

**Quasibiotische Situationen** werden so konzipiert, dass die Personen eine Versuchssituation erkennen, die eigentliche Aufgabe und der Untersuchungszweck aber unklar bleiben.

## Frage 2: Gesichts- und Emotionserkennung

Viele Menschen setzen sich mit technologischen Entwicklungen nicht bzw. wenig auseinander, weswegen sie nicht einschätzen können, wie weit die Technik in ihr Privatleben eingreifen und sie überwachen. Technologien für Gesichtserkennung bieten die Möglichkeiten Menschen zu beobachten und auch zu manipulieren. Deshalb sollte sich jeder mit diesen Technologien und deren Folgen auseinandersetzen.

## Frage 3: Beobachtungsmöglichkeiten im digitalen vs. stationären Handel

Personenbezogene Klickpfadanalysen ermöglichen es, die komplette **Customer Journey** von Kunden nachzuvollziehen. Die Rückmeldungen von digitalen Werbeansprachen können verfolgt, Wiederbesuchsraten ermittelt und Empfehlungsraten gemessen werden. Dadurch haben Online-Anbieter bei Beobachtungen einen entscheidenden Vorteil gegenüber stationären Wettbewerbern, welche die Bewegungen und Transaktionen ihrer Kunden nur in einzelnen Phasen nachvollziehen können.

# Abschnitt 1.7 – Seite 105

---



**Frage 1:** Vergleichen Sie die vier Kontrollmöglichkeiten für externe Störvariablen aus Abschnitt 1.7.2 mit den vorgestellten Auswahlverfahren aus Abschnitt 1.3. Welche Gemeinsamkeiten stellen Sie zwischen den verschiedenen Ansätzen fest?

**Frage 2:** Sehen Sie sich das Video „So führt man Experimente durch“ von Dr. Klaus Ebster auf seinem Youtube-Kanal „Wissenschaftliches Arbeiten“ an: <https://www.youtube.com/watch?v=FYSUfNkJc9Q&t=57sl>. Welches Experimentdesign wird in diesem Versuch gewählt?

**Frage 3:** Welchen Trade-Off zwischen interner und externer Validität muss man bei der Konzeption von Experimenten eingehen?

# Abschnitt 1.7 - Lösungen



## Frage 1: Kontrollmöglichkeit von Störvariablen

Randomisierung = Einfache Zufallsauswahl: Zufällige Verteilung der Testeinheiten im Versuchsansatz (Wahrscheinlichkeitsprinzip)

Einbau in das Untersuchungsdesign = Geschichtete Auswahl: Eine Störvariable wird als zusätzliche unabhängige Variable in den Experimentplan aufgenommen

Matching = Quotenauswahl: Alle Testeinheiten werden strukturgleich bezüglich einer potenziellen Störgröße zusammengesetzt

Konstanthaltung = Konzentrationsauswahl: Eliminieren von Störvariablen durch deren Gleichschaltung

## Frage 2: Experimentdesign

Untersuchung des Ursache-Wirkungs-Zusammenhangs → Simultanexperiment mit Hypothesentest (Laborexperiment)

## Frage 3: Interne und externe Validität bei Experimenten

Marktforschungsinstitute und Hochschulen betreiben an ihren Heimatstandorten vielfach aufwendig konzipierte Labore (z. B. Usability Labs), in die sie Probanden einladen, um die für ein Experiment festgelegten Messungen über (apparative) Beobachtungen und Befragungen vorzunehmen. Der konstruierte Ablauf und die künstliche Umgebung von

**Laborexperimenten** wirken sich gleichzeitig negativ auf die externe Validität aus. **Experimentelle**

**Felduntersuchungen** bieten im Gegensatz dazu eine hohe externe Validität, da sie vor Ort, also z. B. am physischen oder digitalen Point-of-Sale, durchgeführt werden.

# Abschnitt 1.8 – Seite 114



**Frage 1:** Welche projektiven Techniken können bei Tiefeninterviews für das Hervorholen tieferstehender Wertesysteme beim Gegenüber eingesetzt werden?

**Frage 2:** Vergleichen Sie die Rolle eines Diskussionsleiters bei einer Gruppendiskussion und einer Online-Fokusgruppe. Welche besonderen Herausforderungen sind in welcher Situation gegeben?

**Frage 3:** Lesen Sie sich auf der Plattform marktforschung.de den Fachartikel von Karsten Palme zur Marktforschung in der Tourismusbranche durch:  
<https://www.marktforschung.de/marktforschung/a/marktforschung-im-tourismus-mehr-als-nur-gaestebefragungen/>.

Welchen Nutzensvorteil bieten qualitative Studien in dieser Branche?



# Abschnitt 1.8 - Lösungen

---



## Frage 1: Projektive Interviewtechniken

**Bilder-Erzähl-Test:** Reihe von Bildvorlagen, zu denen die Befragten eine Geschichte erzählen sollen

**Ballontest:** Bildvorlagen, die typische Situationen zwischen zwei Menschen darstellen

**Personenzuordnungstest:** Beim **Personenzuordnungstest** wird der Testperson eine Folge von „geeichten“ Bildern mit unterschiedlichen Personentypen vorgelegt und gefragt, welchen Personentyp man am ehesten als typischen Verwender des relevanten Produktes/der Marke bezeichnen kann.

**Einkaufslistenverfahren:** Beim Einkaufslistenverfahren soll der Proband zu einer Einkaufsliste die Person charakterisiert, die die Liste erstellt bzw. die Waren eingekauft hat.

# Abschnitt 1.8 - Lösungen



## Frage 2: Diskussionsleiter

**Gruppendiskussion:** Der Diskussionsleiter orientiert sich an einem groben Leitfaden, in dem alle relevanten Themenbereiche aufgelistet sind. Die Reihenfolge der Themen kann dabei flexibel, entsprechend der sich in den Gesprächen ergebenden Richtungen, behandelt werden. Die beiden Hauptaufgaben des Diskussionsleiters sind es, die Gespräche am Laufen zu halten und eine ausgewogene Einbindung aller Teilnehmer sicherzustellen. Dazu muss er dominierende Meinungsführer ggf. bremsen und zurückhaltende Teilnehmer durch ein direktes Ansprechen ins Spiel bringen.

**Online-Fokusgruppen:** Der Diskussionsleiter hat die Aufgabe Schreib- und Leserechte für alle Teilnehmer zu vergeben, Foreneinträge zu steuern und auf unangemessene Diskussionsbeiträge kurzfristig zu reagieren. Im Vergleich zu einer Live-Moderation müssen bei Online-Fokusgruppen mehr Anstöße gegeben werden, um einen interaktiven Austausch zu initiieren. Dies kann über regelmäßiges Teilen von multimedialen Inhalten oder das Stellen von Aufgaben an alle Teilnehmer erfolgen.

## Frage 3: Vorteile qualitativer Studien in der Tourismusbranche:

Bei quantitativen Studien fehlen qualitative Hintergrundinformationen, die auf Kundenwünsche eingehen; Fragestellungen sind oftmals unklar; Qualitative Methoden wären für komplexe Gästewahrnehmungen im Tourismus sehr geeignet; Reiseentscheidungsprozesse oder auch Hintergründe für Gästezufriedenheit können umfassend ermittelt werden. Bei qualitativen Methoden werden die Hypothesen entwickelt und nicht nur überprüft. Kognitive Kartierung gibt Aufschluss auf wirklich wichtige Attraktionen und auf Störfaktoren im Urlaubsort; Nutzen ist vielfältig sowohl für das Marketing als auch für die Entwicklung von neuen Produkten

# Abschnitt 2 – Seite 142

---



**Frage 1:** Erklären Sie die Unterschiede zwischen der natürlichen und der künstlichen Sterblichkeit bei der Führung eines Verbraucherpanels.

**Frage 2:** Welche Coverage-Probleme bestehen in Verbraucher- und in Handelspanels? Welche dieser Probleme könnten durch eine kombinierte Analyse der beiden Panels wie gelöst werden?

**Frage 3:** Informieren Sie sich auf den Webseiten der UK Market Research Society (MRS) über aktuelle Entwicklungen zu Datenschutz-Vorgaben bei Marktforschungsstudien (GDPR): <https://www.mrs.org.uk/standards/gdpr-faq> .Welche Vorgaben für die Bereiche Datensammlung und internationaler Datentransfer müssen bei der Durchführung internationaler Studien besonders berücksichtigt werden?

# Lösung – Abschnitt 2



## Frage 1: Panelsterblichkeit

**Natürliche Panelsterblichkeit** - Die Führung eines Panels ist von ständigen **Ausfällen** begleitet, d. h. Panelteilnehmer kündigen ihre Mitarbeit auf. Hinzu kommt, dass Personen und Haushalte aufgrund **soziodemografischer Veränderungen** (wie Heirat, Tod, Umzug) aus dem Panel ausscheiden müssen.

**Künstliche Panelsterblichkeit:** Die Institute ihrerseits verändern die Zusammensetzung der Stichprobe dadurch, dass sie Panelteilnehmer **bewusst austauschen** → Grund: Auffrischung der Teilnehmerrotation, aufgrund mangelnder Mitarbeit oder fehlerhafte Erfassung der Panelteilnehmer

## Frage 2: Coverage-Problematik

Die Stichprobe eines Handelspanels weist durch den disproportionalen Ansatz eine **Verzerrung** auf. Umsatzstarke Geschäfte erhalten einen höheren Auswahlanteil als kleine Geschäfte, d. h. sie werden in einem größeren Umfang berücksichtigt, als dies rein anzahlmäßig notwendig wäre. Der Grund hierfür liegt in dem Bemühen, die Marktverhältnisse möglichst real abzubilden, und in größeren Geschäften findet eben, wie die obige Abbildung zeigt, erheblich mehr dieses Marktgeschehens statt, als in kleineren Geschäften. Diese **Disproportionalität** muss im Rahmen einer **Hochrechnung** ausgeglichen werden.

# Lösung – Abschnitt 2



## Frage 3: Datenschutz-Vorgaben

### Generell:

**Datenminimierung:** Nur notwendige Daten sollen gesammelt und kurzzeitig aufbewahrt werden.

**Rechtsgrundlage:** Öffentlich zugängliche Daten dürfen nur mit legitimer Grundlage genutzt werden.

**Schnelle Löschung:** Daten müssen zügig gelöscht werden – Ausnahme: ein berechtigter Grund (aber auch hier muss die Aufbewahrungsfrist klar geregelt sein)

**Anonymisierung:** Vollständig anonymisierte Daten sind frei übertragbar; pseudonymisierte nicht

### Im Ausland:

**USA-Übertragung:** Daten von US-Servern erfordern bestimmte Schutzmaßnahmen wie Standardvertragsklauseln

**Australien-Übertragung:** Datenübertragungen erfordern Standardvertragsklauseln als Schutzmaßnahme, da Australien keine Angemessenheitsentscheidung der EU hat

# Abschnitt 3 – Seite 168

---



**Frage 1:** Wie unterscheiden sich die Ansätze der indirekten und der direkten Messung von Kundenzufriedenheit?

**Frage 2:** Was versteht man unter der weißen, grauen und schwarzen Beschaffung von Wettbewerbsinformationen? Welche Vorgaben gibt der Code of Ethics der SCIP für seine Mitglieder bezüglich dieser drei Beschaffungsarten?

**Frage 3:** Beantragen Sie auf der Webseite <https://info.marketing-data-system.com/arbeiten-mit-mds/> einen zeitlich beschränkten Testzugang für die Nutzung des interaktiven Analysetools von Marktstudien. Entdecken Sie die Möglichkeiten zur Segmentierung von Zielgruppen nach sozioökonomischen, psychografischen und verhaltensorientierten Kriterien anhand des Datensatzes b4p.

# Abschnitt 3 – Lösungen



## Frage 1: Messung von Kundenzufriedenheit

Bei der indirekten Messung ergibt sich der Zufriedenheitswert als **Differenz** zwischen Erwartungen einerseits und konkreten Produkt-/Leistungserfahrungen andererseits

$$GZ_{ij} = \sum_{k=1}^n (E_{ijk} - L_{ijk})$$

Die direkte Messung der Kundenzufriedenheit erfolgt anhand von Skalen, die zur Bewertung der abgefragten Merkmale eingesetzt werden (Multiattributive Messung). Das Verfahren knüpft eng an das sog. Fishbein-Modell an, das ebenfalls von einer **multiplikativen Verknüpfung** der affektiven und kognitiven Komponenten ausgeht.

$$GZ_{ij} = \sum_{k=1}^n (W_{ijk} \cdot L_{ijk})$$

## Frage 2a: Wettbewerbsforschung

|                      |                                                                                            |
|----------------------|--------------------------------------------------------------------------------------------|
| Weiße Beschaffung    | legal und offen; z.B. öffentlich zugängliche Sekundärdaten & klassische Primärerhebungen   |
| Graue Beschaffung    | Legal und verdeckt; Informationsgeber wird im Unklaren gelassen, dass Erhebung stattfindet |
| Schwarze Beschaffung | Illegal und verdeckt; bewusst gegen den Willen des Informationsgebers                      |



# Abschnitt 3 - Lösungen

---

**Frage 2b Code of Ethics der SCIP** (Quelle: <http://www.scip.org/page/Ethical-Intelligence>)

- Der Erwerb oder die Auswertung von Unterlagen konkurrierender Unternehmen, die als „vertraulich“ gekennzeichnet sind, ist nicht zulässig.
- Die audio(visuelle) Aufzeichnung von Gesprächen oder geschlossenen Veranstaltungen der Wettbewerber sowie deren Erwerb ist grundsätzlich unzulässig.
- Bei Anfragen an Konkurrenzunternehmen wird zu Beginn immer der eigene Unternehmensname offen genannt. Das Vorschieben einer vermeintlich neutralen Studie ist nicht zulässig.
- Das Durchführen von Jobinterviews zu nichtexistenten Stellen, mit dem Ziel Bewerber über ihre Unternehmen auszufragen, ist nicht zulässig.
- Mystery Shopping bei Wettbewerbern ist zulässig, solange durch Fotografien oder Aufzeichnungen keine Rechte verletzt werden.
- Das Auswerten von Patentdatenbanken ist zulässig.
- Profile zu Mitarbeitern von Konkurrenzunternehmen können angelegt werden, solange die Daten aus öffentlich zugänglichen Quellen stammen.



# Abschnitt 3 – Lösungen

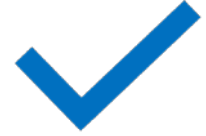

## Frage 1: Messung von Kundenzufriedenheit

Bei der indirekten Messung ergibt sich der Zufriedenheitswert als **Differenz** zwischen Erwartungen einerseits und konkreten Produkt-/Leistungserfahrungen andererseits

$$GZ_{ij} = \sum_{k=1}^n (E_{ijk} - L_{ijk})$$

Die direkte Messung der Kundenzufriedenheit erfolgt anhand von Skalen, die zur Bewertung der abgefragten Merkmale eingesetzt werden (Multiattributive Messung). Das Verfahren knüpft eng an das sog. Fishbein-Modell an, das ebenfalls von einer **multiplikativen Verknüpfung** der affektiven und kognitiven Komponenten ausgeht.

$$GZ_{ij} = \sum_{k=1}^n (W_{ijk} \cdot L_{ijk})$$

## Frage 2: Wettbewerbsforschung

|                      |                                                                                            |
|----------------------|--------------------------------------------------------------------------------------------|
| Weisse Beschaffung   | legal und offen; z.B. öffentlich zugängliche Sekundärdaten & klassische Primärerhebungen   |
| Graue Beschaffung    | Legal und verdeckt; Informationsgeber wird im Unklaren gelassen, dass Erhebung stattfindet |
| Schwarze Beschaffung | Illegal und verdeckt; bewusst gegen den Willen des Informationsgebers                      |

# Abschnitt 4 – Seite 216



**Frage 1:** Vergleichen Sie die Vor- und Nachteile von klassischen Storetests und Testmarktsimulationen für die Einführung von Neuprodukten anhand der Kriterien zu Beurteilung von Beobachtungsverfahren aus Abschnitt 1.6. Für welche speziellen Fragestellungen bietet sich das jeweilige Verfahren an?

**Frage 2:** Welchen Vorteil haben absatzorientierte Modelle zur Markenbewertung gegenüber finanzorientierten Analysen? Welches Modell zur Markenbewertung wird in den Marketing-Fachzeitschriften der letzten Jahre am häufigsten zitiert?

**Frage 3:** Recherchieren Sie auf den Webseiten von MediaAnalyzer aktuelle Veröffentlichungen zu Vollstudien und Kurzbefragungen bezüglich der Werbewirkung: <https://www.mediaanalyzer.com/aktuelle-studien-zur-wirkung-von-werbung/>. Ordnen Sie die zentralen Aussagen der jeweiligen Studien den berücksichtigten Stufen zur Werbewirkungskette nach Tabelle 53 zu.

# Abschnitt 4 - Lösungen



## Frage 1: Storetests vs. Testmarktsimulationen

**Klassische Storetest:** Absatzwirkung einer Veränderung in der realen Handelslandschaft

**Testmarktsimulation:** psychologische Wahrnehmung von Produktveränderungen in simulierten Märkten

| Klassische Storetests                    |                                          | Testmarktsimulationen                                        |                                               |
|------------------------------------------|------------------------------------------|--------------------------------------------------------------|-----------------------------------------------|
| Vorteil                                  | Nachteil                                 | Vorteil                                                      | Nachteil                                      |
| Schnelle und kostengünstige Durchführung | Konzentration auf reine Abverkaufszahlen | Experimentelles Setup mit entsprechender Gestaltungsvielfalt | Hohe Kosten, externe Validität der Ergebnisse |

# Abschnitt 4 - Lösungen

---



## Frage 2: Markenbewertung

Im Gegensatz zu den finanzorientierten Modellen dienen die absatz- bzw. verhaltensorientierten Modelle primär der **Markenführung**. Es geht um die Wahrnehmung einer Marke aus dem Blickwinkel der Abnehmer, die schließlich in einer bestimmten Wertschätzung der Marke mündet.

Am meisten zitiertes Modell: Eisberg-Modell von Kantar (Relaunch 2013)

# Abschnitt 4 - Lösungen



## Frage 3: Werbewirkungsstudien

### Beispiel Steckbrief 1 - Track the Success

#### 1. Zielsetzung der Studie (inkl. Forschungsfragen)

Die experimentelle Inhome-Studie „Track the Success“ untersucht, wie Zuschauer und Nutzer Medieninhalte auf unterschiedlichen Bewegtbildkanälen rezipieren und welche Implikationen die Rezeptionssituation für die Wahrnehmung und Wirkung der Werbung hat. Die Studie vergleicht Werbewirkung und Rezeptionssituation identischer Werbespots für TV, BVOD, YouTube und Facebook.

Untersucht wurden drei Faktoren: Wahrnehmung, Reaktion und Wirkung. Unter „Wahrnehmung“ fallen zum einen alle Variablen zur technischen Ausspielung der Werbung: Wie lange wurde die Werbung abgespielt, mit welcher Toneinstellung und welcher Bildschirmabdeckung? Zum anderen geht es um die visuelle Zuwendung der Zuschauer: Wie lange haben sie während der Werbung in Richtung Screen geschaut? „Reaktion“ meint die emotionale Reaktion und die Aktivierung. Wie gut gelingt es der Werbung, den Zuschauer zu emotionalisieren? Ist er beim Betrachten von Content und Werbung eher entspannt oder aktiviert? Und wie ausgewogen ist die Rezeptionsverfassung?

Die Studie liefert Gründe dafür, warum Werbung auf den Kanälen unterschiedlich gut funktioniert. Werbung im Fernsehen oder auf BVOD hat eine größere Chance, wahrgenommen zu werden, emotionalisiert stärker und wird darüber hinaus in einer entspannten und emotional ausgewogenen Situation rezipiert

### Werbewirkungsstufen

### Verarbeitung & Bewertung

### Beispiel Steckbrief 2– Das Umfeld macht den Unterschied

#### 1. Zielsetzung der Studie (inkl. Forschungsfragen)

Ziel der Studie war die Ergründung von Umfeldeffekten in der regionalen Tageszeitung.

Die zentrale Fragestellung war: Wie beeinflusst das redaktionelle Umfeld einer Zeitung die Wahrnehmung der Anzeige?

### Wahrnehmung & psychologische

# Abschnitt 5 – Seite 280 (1/2)



**Frage 1:** In einer Studie von 30 Sportschuh-Käufern wurden bei einer Analyse der Kaufpräferenz von zwei Marken der folgende Unterschied zwischen Frauen und Männern beobachtet und in einer Kreuztabelle visualisiert:

|        | Marke A | Marke B |
|--------|---------|---------|
| Männer | 9       | 3       |
| Frauen | 6       | 12      |

Welche Anzahl von Personen hätte man in der Zelle „Männer – Marke A“ erwartet, wenn es keinen Unterschied in der Präferenz von Marken zwischen den beiden Geschlechtern gibt?

# Abschnitt 5 – Seite 280 (2/2)

---

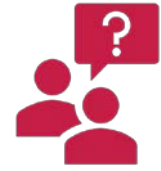

**Frage 2:** Laden Sie sich den Datensatz „Sportschuh Panel“ von der begleitenden Webseite zu diesem Buch <http://www.degruyter.com/view/title/671819> herunter und öffnen Sie die Datei mit dem Statistikprogramm SPSS. Ermitteln Sie den Modus, den Median und das arithmetische Mittel für den Besitz von Sportschuhen in Paaren (F09) unter allen Vegetariern (F13), die an der Studie teilgenommen haben.

**Frage 3:** Führen Sie mit Hilfe des Datensatzes „Sportschuh Panel“ eine multiple Regressionsanalyse für den Einfluss der Sportintensität der Befragten in Stunden pro Woche (F02) und der durchschnittlichen Tragdauer von Sportschuhen in Monaten (F11) auf den Besitz von Sportschuhen in Paaren (F09) durch. Wie lautet die Regressionsfunktion Ihrer Analyse? Führt diese Regression zu signifikanten Ergebnissen? Welche unabhängige Variable hat aufgrund welcher Kennzahl einen höheren Einfluss auf den Besitz von Sportschuhen in Paaren?

# Abschnitt 5 - Lösungen



## Frage 1: Kreuztabelle

|        | Marke A | Marke B | Gesamt |
|--------|---------|---------|--------|
| Männer | 9       | 3       | 12     |
| Frauen | 6       | 12      | 18     |
| Gesamt | 15      | 15      | 30     |

Berechnung:  $e_{(AB)} = \frac{12 \cdot 15}{30} = 6$

## Frage 2: Mittelwerte in Subgruppen

### Statistiken

Wie viele Paar Sportschuhe besitzen Sie?

|            |         |                |
|------------|---------|----------------|
| N          | Gültig  | 11             |
|            | Fehlend | 0              |
| Mittelwert |         | 4,82           |
| Median     |         | 5,00           |
| Modus      |         | 4 <sup>a</sup> |

a. Mehrere Modi vorhanden. Der kleinste Wert wird angezeigt.



# Abschnitt 5 - Lösungen

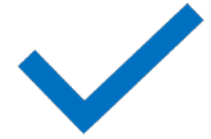

## Frage 3: multiple Regression

| Modell |                                                                    | Nicht standardisierte Koeffizienten |             | Standardisierte Koeffizienten | T      | Sig. |
|--------|--------------------------------------------------------------------|-------------------------------------|-------------|-------------------------------|--------|------|
|        |                                                                    | Regressionskoeffizient B            | Std.-Fehler | Beta                          |        |      |
| 1      | (Konstante)                                                        | 3,540                               | ,790        |                               | 4,482  | ,000 |
|        | Wie viele Stunden Sport treiben Sie im Durchschnitt pro Woche?     | ,508                                | ,100        | ,607                          | 5,067  | ,000 |
|        | Wie viele Monate tragen Sie durchschnittlich ein Paar Sportschuhe? | -,068                               | ,023        | -,361                         | -3,009 | ,006 |

Höherer relativer Einfluss der Stunden pro Sport im Vergleich zu der Tragedauer der Schuhe auf den Besitz von Sportschuhen (Erkennbar über Relation der Beta-Koeffizienten)

a. Abhängige Variable: Wie viele Paar Sportschuhe besitzen Sie?

Regressionsfunktion:  $y = 3,54 + 0,508x_1 - 0,068x_2$

### ANOVA<sup>a</sup>

| Modell |                                | Quadratsumme | df | Mittel der Quadrate | F      | Sig.              |
|--------|--------------------------------|--------------|----|---------------------|--------|-------------------|
|        |                                |              |    |                     |        |                   |
| 1      | Regression                     | 85,581       | 2  | 42,791              | 35,449 | ,000 <sup>b</sup> |
|        | Nicht standardisierte Residuen | 31,384       | 26 | 1,207               |        |                   |
|        | Gesamt                         | 116,966      | 28 |                     |        |                   |

Höchst signifikanter Einfluss der beiden unabhängigen Variablen auf den Besitz von Sportschuhen

a. Abhängige Variable: Wie viele Paar Sportschuhe besitzen Sie?

b. Einflußvariablen : (Konstante), Wie viele Monate tragen Sie durchschnittlich ein Paar Sportschuhe?, Wie viele Stunden Sport treiben Sie im Durchschnitt pro Woche?

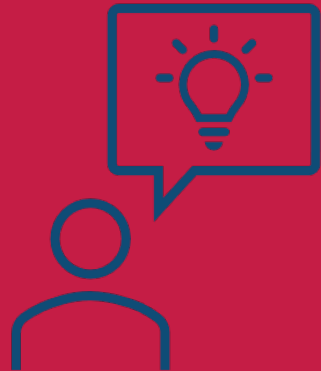

DE GRUYTER  
OLDENBOURG

Jörg Koch, Florian Riedmüller

# MARKTFORSCHUNG

GRUNDLAGEN, INSTRUMENTE UND FALLBEISPIELE  
AUS DER PRAXIS

9. AUFLAGE

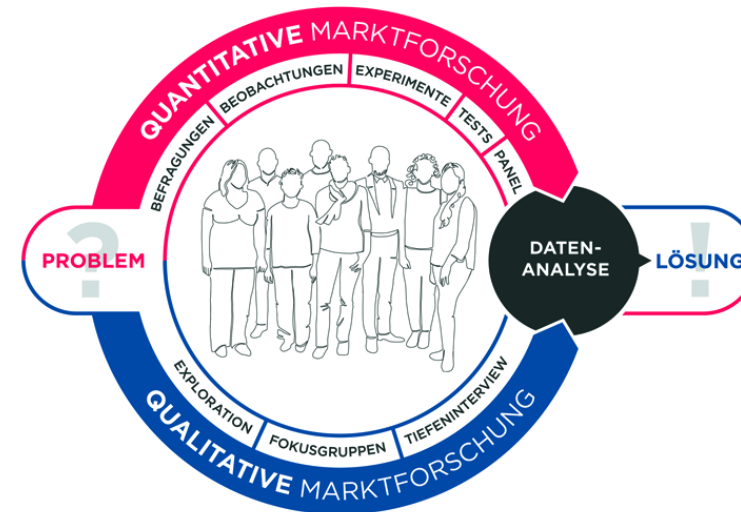

Mit Zusatz-  
material zum  
Download

DE  
G
